# Supplementary material for: Glycomic Analysis of Human Respiratory Tract Tissues and Correlation with Influenza Virus Infection
Source: PLoS Pathog. 2013 Mar 14;9(3):e1003223. doi: 10.1371/journal.ppat.1003223 (PMC3597497; doi:10.1371/journal.ppat.1003223)
Supplement: Text S2 — Supplementary table of glycan composition with relative abundance. (XLS) [file ppat.1003223.s002.xls]

## Sheet: Table S1 Human adult lung N gly
Composition	Observed Mass/Charge (m/z)	Symbolic representation	Relative abundance / %
Hex5 HexNAc2	1579.8		76.9
Hex6 HexNAc2	1783.9		84.9
Fuc1 Hex3 HexNAc4	1835.9		8.2
Hex7 HexNAc2	1988		54.9
Fuc1 Hex4 HexNAc4	2040		17.6
Hex5 HexNAc4	2070		15.3
Hex8 HexNAc2	2192.1		33.6
Fuc1 Hex5 HexNAc4	2244.1		43.1
Fuc1 Hex4 HexNAc5	2285.1		13.6
Hex9 HexNAc2	2396.2		20.8
NeuAc1 Hex5 HexNAc4	2431.2		18.4
Fuc1 Hex5 HexNAc5	2489.3		16.2
NeuAc1 Fuc1 Hex5 HexNAc4	2605.3		100
NeuAc1 Fuc2 Hex5 HexNAc4	2779.4		5.8
NeuAc2 Hex5 HexNAc4	2792.4		10.3
NeuAc1 Fuc1 Hex5 HexNAc5	2850.4		9.7
NeuAc2 Fuc1 Hex5 HexNAc4	2966.5		28.8
NeuAc1 Fuc1 Hex6 HexNAc5	3054.6		15.7
NeuAc2 Fuc1 Hex5 HexNAc5	3211.6		2.5
NeuAc2 Fuc1 Hex6 HexNAc5	3415.8		7.1
NeuAc1 Fuc1 Hex7 HexNAc6	3503.8		4.2
NeuAc3 Fuc1 Hex6 HexNAc5	3777		3
NeuAc2 Fuc1 Hex7 HexNAc6	3865		2.5
NeuAc2 Fuc1 Hex8 HexNAc7	4314.3		1.4
NeuAc1 Fuc1 Hex9 HexNAc8	4402.2		0.6
NeuAc2 Fuc1 Hex9 HexNAc8	4763.5		0.9
NeuAc2 Fuc1 Hex10 HexNAc9	5213.7		0.5
NeuAc1 Fuc1 Hex11 HexNAc10	5299.8		0.2
NeuAc2 Fuc1 Hex11 HexNAc10	5662.8		0.4
NeuAc2 Fuc1 Hex12 HexNAc11	6112.1		0.23
NeuAc2 Fuc1 Hex13 HexNAc12	6561.1		0.1

## Sheet: Table S2-Linkage analysis-Lung
Human adult lung
Assignment	Elution time (min)	Relative Abundance
t-Fuc	17.44	0.12
t-Man	18.95	0.29
t-Gal	19.21	0.18
2-linked Man	20.11	1
3-linked Gal	20.39	0.23
6-linked Gal	20.91	0.15
2,4-linked Man	21.29	0.07
2,6-linked Man	21.69	0.09
3,6-linked Man	21.85	0.47
3,4,6-linked Man	22.3	0.08
t-GlcNAc	22.79	0.04
4-linked GlcNAc	23.68	0.99
3,4-linked GlcNAc	24.52	0.02
4,6-linked GlcNAc	24.98	0.07

## Sheet: TableS3 Human adult bronc N gly
Composition	Observed Mass/Charge (m/z)	Symbolic representation	Relative abundance / %
Hex5 HexNAc2	1579.8		82.7
Hex6 HexNAc2	1783.9		82.8
Hex7 HexNAc2	1988		46.4
Fuc1 Hex4 HexNAc4	2040		17.8
Hex5 HexNAc4	2070		17
Hex8 HexNAc2	2192.1		53.7
Fuc1 Hex5 HexNAc4	2244.1		67.6
Fuc1 Hex4 HexNAc5	2285.1		62.2
Hex9 HexNAc2	2396.2		45.9
NeuAc1 Hex5 HexNAc4	2431.2		27.5
Fuc1 Hex5 HexNAc5	2489.2		42.5
NeuAc1 Fuc1 Hex5 HexNAc4	2605.3		100
Fuc1 Hex6 HexNAc5	2693.3		17.8
NeuAc1 Fuc1 Hex5 HexNAc5	2850.4		14.6
NeuAc2 Fuc1 Hex5 HexNAc4	2966.9		5
NeuAc1 Fuc1 Hex6 HexNAc5	3054.5		24.3
Fuc1 Hex7HexNAc6	3142.6		3
NeuAc1 Fuc1 Hex6 HexNAc6	3299.6		2.3
NeuAc2 Fuc1 Hex6 HexNAc5	3415.7		1.7
NeuAc1 Fuc1 Hex7 HexNAc6	3503.7		5.5
NeuAc2 Fuc1 Hex7 HexNAc6	3864.9		0.9
NeuAc1 Fuc1 Hex8 HexNAc7	3953		1.6
NeuAc2 Fuc1 Hex8 HexNAc7	4314.1		0.5
NeuAc1 Fuc1 Hex9 HexNAc8	4402.2		0.6
NeuAc2 Fuc1 Hex9 HexNAc8	4763.3		0.3
NeuAc1 Fuc1 Hex10 HexNAc9	4851.4		0.2
NeuAc2 Fuc1 Hex10 HexNAc9	5213.4		0.2
NeuAc1 Fuc1 Hex11 HexNAc10	5301.2		0.1
NeuAc2 Fuc1 Hex11 HexNAc10	5662.7		0.1

## Sheet: Table S4-Linkage analysis-Bronc
Human adult bronchus
Assignment	Elution time (min)	Relative Abundance
t-Fuc	17.45	0.11
t-Man	18.96	0.36
t-Gal	19.22	0.16
2-linked Man	20.11	1
3-linked Gal	20.41	0.18
6-linked Gal	20.92	0.05
2,4-linked Man	21.29	0.04
2,6-linked Man	21.7	0.05
3,6-linked Man	21.86	0.49
3,4,6-linked Man	22.31	0.06
t-GlcNAc	22.8	0.03
4-linked GlcNAc	23.68	0.64
3,4-linked GlcNAc	24.53	0.04
4,6-linked GlcNAc	24.89	0.07

## Sheet: Table S5 Human adult lung O gly
Composition	Observed Mass/Charge (m/z)	Symbolic representation	Relative abundance / %
Hex1 HexNAc1 -itol	534.4		58
NeuAc1 Hex1 HexNAc1 -itol	895.6		100
NeuAc2 Hex1 HexNAc1 -itol	1256.7		56.9
NeuAc1Hex2 HexNAc2 -itol	1344.8		4.2

## Sheet: TableS6 Human adult bronc O gly
Composition	Observed Mass/Charge (m/z)	Symbolic representation	Relative abundance / %
Hex1 HexNAc1 -itol	534.4		100
NeuAc1 Hex1 HexNAc1 -itol	895.6		7.7
Hex2 HexNAc2 -itol	983.7		8.8
Fuc1Hex2 HexNAc2 -itol	1157.8		0.6
NeuAc2 Hex1 HexNAc1 -itol	1256.8		0.5
NeuAc1Hex2 HexNAc2 -itol	1344.9		0.7

## Sheet: TableS7 Human paed lung N gly 
Composition	Observed Mass/Charge (m/z)	Symbolic representation	Relative abundance / %
Fuc1 Hex4 HexNAc4	2040		15.6
Hex5 HexNAc4	2070		37
Hex8 HexNAc2	2192.1		68.2
Fuc1 Hex5 HexNAc4	2244.1		80.6
Fuc1 Hex4 HexNAc5	2285.1		47.7
Hex9 HexNAc2	2396.2		73
NeuAc1 Hex5 HexNAc4	2431.2		27.1
Fuc1 Hex5 HexNAc5	2489.2		65.3
NeuAc1 Fuc1 Hex5 HexNAc4	2605.3		100
Fuc1 Hex6 HexNAc5	2693.3		24.1
NeuAc2 Hex5 HexNAc4	2792.3		57.4
NeuAc1 Fuc1 Hex5 HexNAc5	2850.4		13.8
NeuAc2 Fuc1 Hex5 HexNAc4	2966.4		38.7
NeuAc1 Fuc1 Hex6 HexNAc5	3054.4		16.2
Fuc1 Hex7HexNAc6	3142.5		5.5
NeuAc2 Fuc1 Hex6 HexNAc5	3415.6		6.2
NeuAc3 Fuc1 Hex6 HexNAc5	3776.7		4
NeuAc1 Fuc1 Hex8 HexNAc7	3952.8		0.7
NeuAc2 Fuc1 Hex8 HexNAc7	4314.3		0.5

## Sheet: TableS8 Human paed bronc N gly 
Composition	Observed Mass/Charge (m/z)	Symbolic representation	Relative abundance / %
Hex5 HexNAc4	2070		21.6
Hex8 HexNAc2	2192.1		100
Fuc1 Hex5 HexNAc4	2244.1		58.3
Fuc1 Hex4 HexNAc5	2285.1		55.1
Hex9 HexNAc2	2396.2		87.8
Fuc1 Hex5 HexNAc5	2489.3		55.8
NeuAc1 Fuc1 Hex5 HexNAc4	2605.3		11.3
Fuc1 Hex6 HexNAc5	2693.3		13.6
NeuAc2 Fuc1 Hex5 HexNAc4	2966.5		4.7
NeuAc1 Fuc1 Hex6 HexNAc5	3054.6		1.6
Fuc1 Hex7HexNAc6	3142.5		1.6
Fuc1 Hex7 HexNAc7	3387.6		0.8
NeuAc2 Fuc1 Hex6 HexNAc5	3415.6		0.5
NeuAc3 Fuc1 Hex6 HexNAc5	3776.7		0.3
NeuAc2 Fuc1 Hex8 HexNAc7	4313.9		0.1
NeuAc2 Fuc1 Hex9 HexNAc8	4762.9		0.1

## Sheet: TableS9 Human paed lung O gly 
Composition	Observed Mass/Charge (m/z)	Symbolic representation	Relative abundance / %
Hex1 HexNAc1 -itol	534.2		100
NeuAc1 Hex1 HexNAc1 -itol	895.4		1.5
Hex2 HexNAc2 -itol	983.4		7.1
Fuc1Hex2 HexNAc2 -itol	1157.5		2.6
NeuAc2 Hex1 HexNAc1 -itol	1256.5		5.2

## Sheet: TableS10Human paed bronc O gly 
Composition	Observed Mass/Charge (m/z)	Symbolic representation	Relative abundance / %
Hex1 HexNAc1 -itol	534.2		100
HexNAc2 -itol	575.3		20.1
Fuc1Hex1 HexNAc1 -itol	708.3		20.9
Hex1 HexNAc2 -itol	779.4		8.2
NeuAc1 Hex1 HexNAc1 -itol	895.4		3.4
Fuc1Hex1 HexNAc2 -itol	953.4		21.3
Hex2 HexNAc2 -itol	983.4		37.3
Hex1 HexNAc3 -itol	1024.4		4.8
Fuc1Hex2 HexNAc2 -itol	1157.5		3.7
Fuc1 Hex1 HexNAc3 -itol	1198.5		13
NeuAc2 Hex1 HexNAc1 -itol	1256.5		3.5
Fuc2 Hex2 HexNAc2 -itol	1331.5		0.8
NeuAc2 Hex1 HexNAc1 -itol	1344.6		0.8
